# Supplementary material for: Novel potent anti-STEAP1 bispecific antibody to redirect T cells for cancer immunotherapy
Source: PubMed Central journal article supplement — J Immunother Cancer. 2021 Sep 8;9(9):e003114. doi: 10.1136/jitc-2021-003114 (PMC8438958; doi:10.1136/jitc-2021-003114), 2021-09-08

## Supplementary Materials for

**A Novel Potent Anti-STEAP1 Bispecific antibody to Redirect T Cells for Cancer  
Immunotherapy**

Running title: Anti-STEAP1 Bispecific Antibody for Ewing Sarcoma Family of Tumors

Tsung-Yi Lin Ph. D.<sup>1,2</sup>Jeong A Park MD. Ph.D.<sup>1,2</sup>Alan Long Ph.D.<sup>1</sup>Hongfen Guo M.S.<sup>1</sup>Nai-Kong V. Cheung, M.D., Ph.D.<sup>1\*</sup>

<sup>1</sup>Department of Pediatrics,  
Memorial Sloan Kettering Cancer Center,  
New York, NY, 10065

<sup>2</sup>Co first authors

\*Corresponding author

Supplementary Table S1. Binding affinities of humanized STEAP1 IgG antibodies by cell-based fluorescent method.

|                           | Chimeric X-120 | VL1+VH1   | VL1+VH2   | VL1+VH5     | VL2+VH2   |
|---------------------------|----------------|-----------|-----------|-------------|-----------|
| Light chain humanness (%) | 83             | 91        | 91        | 91          | 91        |
| Heavy chain humanness (%) | 75             | 87        | 87        | 87          | 87        |
| Bmax                      | 147 ± 20       | 150 ± 10  | 151 ± 5   | 115 ± 18    | 167 ± 9   |
| KD (nM)                   | 0.7 ± 0.6      | 1.5 ± 0.5 | 2.6 ± 0.3 | 39.7 ± 12.6 | 2.4 ± 0.6 |
| R2                        | 0.6            | 0.92      | 0.99      | 0.98        | 0.96      |

Supplementary Table S2. Purity and Stability of humanized STEAP1 IgG1 antibodies by HPLC.

| Proteins      | OD (280nm) | Conc. (mg/ml) | 0 hr (%) | Freeze-thaw (%) | 40°C for 7 days (%) | 40°C for 14 days (%) | 40°C for 21 days (%) | 40°C for 28 days (%) |
|---------------|------------|---------------|----------|-----------------|---------------------|----------------------|----------------------|----------------------|
| Chimeric X120 | 2.58       | 1.58          | 99.2     | 98              | 90.4                | 86                   | 80.5                 | 76.1                 |
| VL1+VH1       | 3.34       | 2.03          | 99.4     | 98.9            | 91.9                | 87.4                 | 81.5                 | 77.3                 |
| VL1+VH2       | 3          | 1.82          | 99.5     | 93.2            | 90.9                | 88.4                 | 82.4                 | 78.2                 |
| VL1+VH5       | 2.75       | 1.66          | 99.5     | 91              | 91.2                | 88.5                 | 83.7                 | 79.5                 |
| VL2+VH1       | 3.49       | 2.12          | 99.5     | 97.9            | 92.8                | 88.7                 | 83.8                 | 80.2                 |
| VL2+VH2       | 3.67       | 2.23          | 99.4     | 98              | 91.8                | 88.8                 | 83.7                 | 79.6                 |
| VL3+VH1       | 3.48       | 2.12          | 99.4     | 97.2            | 91.6                | 88.4                 | 82.1                 | 78                   |
| VL3+VH2       | 2.34       | 1.42          | 99.2     | 97.6            | 80.5                | 68.5                 | 57.4                 | 50.6                 |
| VL4+VH1       | 3.26       | 1.98          | 99.4     | 98.6            | 86.1                | 73.7                 | 62                   | 54.1                 |
| VL4+VH2       | 3.14       | 1.91          | 99.4     | 99.2            | 85.8                | 73.1                 | 61.7                 | 53.1                 |

Supplementary Table S3. Amino acid sequences of VH and VL regions

| Variable Region | Amino Acid sequence                                                                                                          |
|-----------------|------------------------------------------------------------------------------------------------------------------------------|
| VH1             | QVQVQESGPGLVKPSQTLSTCTVTGYSITSDYAWNWIWIRQPPGKGLEWMGYISNSGSTSYNPSLKSRLTISRDTSKNQFSLKLSSTVAADTAVYYCARERNYDYDDYYAMDYWGQGTTTLVSA |
| VH2             | DVQVQESGPGLVKPSQTLSTCTVTGYSITSDYAWNWIWIRQPPGKGLEWMGYISNSGSTSYNPSLKSRLTISRDTSKNQFSLKLSSTVAADTAVYYCARERNYDYDDYYAMDYWGQGTTTLVSA |
| VH5             | DVQVQESGPGLVKPSQTLSTCTVTGYSITSDYAWNWIWIRQPPGKGLEWMGYISNSGSTSYNPSLKSRLTISRDTSKNQFSLKLSSTVAADTAVYYCARERNYDYDDYYAMDYWGQGTTTLVSA |
| VL1             | DIVMTQSPDSLAVSLGERVTMNCSSQSLLYRSNQKNYLAWYQQKPGQSPKLLIYWASTRESGVPDRFSGSGSGTDFTLTISLVQAEDVAVYYCQYYNYPRTFGGGKVEIKR              |
| VL2             | DIVMTQSPDSLAVSVGERVTMNCSSQSLLYRSNQKNYLAWYQQKPGQPPKLLIYWASTRESGVPDRFSGSGSGTDFTLTISLVQAEDVAVYYCQYYNYPRTFGGGKVEIKR              |

Supplementary Table S4. Purity and Stability of anti-STEAP1 bispecific antibodies by HPLC.

| BsAb  | Conc. (mg/mL) | 0 hour (%) | Freeze-thaw (%) | 40°C for 7 days (%) | 40°C for 14 days (%) | 40°C for 21 days (%) | 40°C for 28 days (%) |
|-------|---------------|------------|-----------------|---------------------|----------------------|----------------------|----------------------|
| BC259 | 1.8           | 88.2       | 86.3            | 85.2                | 79.5                 | 72.3                 | 63.4                 |
| BC260 | 1.2           | 87.9       | 86.1            | 84.8                | 79.7                 | 75.6                 | 66.2                 |
| BC261 | 1.2           | 85.7       | 83.4            | 82.4                | 77.1                 | 74.5                 | 70.0                 |
| BC262 | 1.3           | 88.4       | 86.4            | 84.9                | 81.1                 | 77.0                 | 64.5                 |

Supplementary Table S5. STEAP1-BsAb binding to varieties of tumor cell line.

| Cancer                   | Cell line      | MFI of unstained control | MFI of STEAP1 (BC261 binding) |
|--------------------------|----------------|--------------------------|-------------------------------|
| Breast cancer            | HTB 132        | 103                      | 117                           |
|                          | MCF7           | 97                       | 118                           |
|                          | HCC1954        | 108                      | 130                           |
| Colorectal cancer        | LS174T LUC     | 113                      | 147                           |
|                          | SW1222         | 100                      | 130                           |
| DSRCT                    | BER            | 102                      | 122                           |
|                          | BZ             | 108                      | 209                           |
| EFT                      | TC-32          | 94                       | 554                           |
|                          | TC71           | 100                      | 397                           |
|                          | SK-ES-1        | 101                      | 292                           |
|                          | A673           | 105                      | 341                           |
|                          | A4573          | 100                      | 292                           |
|                          | SKELP          | 99                       | 226                           |
|                          | TC71           | 103                      | 271                           |
|                          | SKEAW          | 102                      | 204                           |
|                          | SKERT          | 104                      | 170                           |
| Gastric cancer           | SKNMC          | 150                      | 161                           |
|                          | AGS            | 107                      | 116                           |
|                          | NCI-N87        | 105                      | 127                           |
| Hepatocellular carcinoma | HEP G2         | 91                       | 119                           |
|                          | SK-HEP-1       | 97                       | 146                           |
| Melanoma                 | M14 Luc        | 109                      | 135                           |
|                          | M14            | 103                      | 100                           |
| Neuroblastoma            | IMR32 LUC      | 103                      | 120                           |
|                          | SK-N-FI        | 111                      | 137                           |
|                          | BE(1)N         | 100                      | 140                           |
|                          | IMR32          | 109                      | 155                           |
|                          | SKNSH          | 89                       | 112                           |
| Osteosarcoma             | U2OS           | 116                      | 175                           |
|                          | U2OS LUC       | 141                      | 132                           |
|                          | SAOS2          | 107                      | 165                           |
|                          | 143B LUC       | 92                       | 214                           |
|                          | CRL-1427       | 88                       | 439                           |
| Canine osteosarcoma      | D-17           | 106                      | 227                           |
|                          | DAN            | 102                      | 144                           |
|                          | DSN            | 102                      | 219                           |
|                          | DSDH           | 105                      | 146                           |
| Pancreatic cancer        | SW1990 EGFR KO | 100                      | 135                           |
|                          | SW1990 Her2 KO | 106                      | 136                           |

|                        |                   |     |     |
|------------------------|-------------------|-----|-----|
|                        | KYSE-70           | 105 | 120 |
|                        | MIA PaCa-2        | 104 | 123 |
| Prostate cancer        | DU145             | 94  | 158 |
|                        | PC3 PSMA mTurqCBG | 111 | 127 |
|                        | PC3 tdrsrRLuc     | 98  | 118 |
|                        | PC3 PSMA          | 104 | 118 |
|                        | PC3               | 105 | 112 |
|                        | LNCaP AR          | 104 | 297 |
|                        | CWR22             | 116 | 252 |
|                        | 22Rv1             | 102 | 210 |
|                        | VCaP              | 107 | 145 |
|                        | DU145             | 98  | 210 |
| Rhabdomyosarcoma       | RH30              | 88  | 108 |
|                        | RH41              | 105 | 116 |
|                        | RH30              | 101 | 120 |
| Small cell lung cancer | NCI-H524          | 87  | 133 |
|                        | NCI-N417          | 104 | 147 |
| Wilms tumor            | Wilms1            | 108 | 361 |

Supplementary Table S6. STEAP1 expression (MFI, Mean Fluorescence Intensity) in multiple tumor cell lines and *in vitro* sensitivities (EC<sub>50</sub>, pM) to anti-STEAP1 BsAb (BC261). The MFI of unstained control was set to 5.

| Cancer                        | Cell line | MFIs  | EC <sub>50</sub> (pM) |
|-------------------------------|-----------|-------|-----------------------|
| Ewing sarcoma family of tumor | TC-32     | 168   | 4.9                   |
|                               | TC71      | 128.8 | 1.1                   |
|                               | SK-ES-1   | 75.2  | 3                     |
|                               | A4573     | 74.9  | 5                     |
|                               | SKEAW     | 58.3  | 25.8                  |
|                               | SKELP     | 90    | 1.8                   |
|                               | SKERT     | 61.4  | 8.2                   |
|                               | SKNMC     | 12.8  | 10.9                  |
| Prostate cancer               | LNCaP-AR  | 74    | 21.1                  |
|                               | CWR22     | 26    | 26.7                  |
|                               | VCaP      | 11    | 214.8                 |
| Canine osteosarcoma           | D-17      | 121   | 24.8                  |
|                               | DSN       | 83    | 7.2                   |
|                               | DAN       | 26    | 29.5                  |
|                               | DSDh      | 23    | 16.2                  |
| Neuroblastoma                 | IMR32     | 5     | >5000                 |
| Acute leukemia                | HL-60     | 5     | >5000                 |



Supplementary Table S7. Purity, affinity, and endotoxin of STEAP1-BsAb formats.

| Biclone | Antibody format | Purity (%),<br>HPLC | Binding affinity KD (M) |        | Endotoxin<br>(EU/mg) |
|---------|-----------------|---------------------|-------------------------|--------|----------------------|
|         |                 |                     | CD3                     | Target |                      |
| BC261   | IgG-[L]-scFv    | 95                  | 6.02E-09                | ND     | <2                   |
| BC328   | Monomeric BiTE  | 90                  | 4.39E-08                | ND     | <2                   |
| BC329   | Dimeric BiTE    | 89                  | 4.08E-09                | ND     | <2                   |
| BC330   | BiTE-Fc         | 92                  | 2.80E-09                | ND     | <2                   |
| BC365   | IgG-[H]-scFv    | 95                  | 9.46E-09                | ND     | <2                   |
| HD148   | IgG-heterodimer | 95                  | 2.64E-08                | ND     | <2                   |

Supplementary Table S8. Tumor infiltrating lymphocytes quantified by area under each BLI curves

| Treatment                       | TIL quantified by BLI AUC |          |                         |         |
|---------------------------------|---------------------------|----------|-------------------------|---------|
|                                 | Mean                      | SEM      | Relative to IgG[L]-scFv | P-value |
| No treatment                    | 1.76E+04                  | 8.78E+03 | -                       | -       |
| STEAP-1 IgG-[L]-scFv (BC261)    | 2.10E+07                  | 1.05E+07 | 100%                    | -       |
| STEAP-1 monomeric BiTE (BC327)  | 7.53E+05                  | 3.77E+05 | 4%                      | 0.01    |
| STEAP-1 dimeric BiTE (BC329)    | 1.21E+06                  | 6.06E+05 | 6%                      | 0.01    |
| STEAP-1 BiTE-Fc (BC330)         | 4.22E+05                  | 2.11E+05 | 2%                      | 0.01    |
| STEAP-1 IgG-[H]-scFv (BC365)    | 6.56E+05                  | 3.28E+05 | 3%                      | 0.01    |
| STEAP-1 IgG heterodimer (HD148) | 1.02E+06                  | 5.09E+05 | 5%                      | 0.01    |

Supplementary Fig. S1. Characteristics of rehumanized anti-STEAP1 monoclonal antibodies and STEAP1 T cell-engaging bispecific antibodies

(A) Mean fluorescence intensities (MFIs) of STEAP1 IgG antibody binding to TC-32 EFT cell line, analyzed by flow cytometry. The MFI of unstained control was set to 5. (B) Binding avidity of humanized STEAP1 IgG clones following repeated cycles of washing using PBS/EDTA as dissociation buffer.

Supplementary Fig. S2. Properties of anti-STEAP1 T cell-engaging bispecific antibodies.

(A) Purity of STEAP1 BsAb BC261 by SEC-HPLC. (B) STEAP1 BsAb binding to STEAP1(+) tumor cell lines analyzed by flow cytometry. The MFI of unstained control was set to 5.

Supplementary Fig. S3. *In vitro* BC261 antibody-dependent T cell mediated cytotoxicity against STEAP1(+) canine osteosarcoma cell lines.

(A) Antibody-dependent T cell mediated cytotoxicity (ADTC) as a function of increasing doses of BC261 against canine osteosarcoma cell lines. Effector to target cell ratio (ET ratio) was 10:1.

Supplementary Fig. S4. *In vivo* TH1 cell cytokine release after STEAPI BsAb armed T cells treatment.

(A) BC261 armed T cells ( $10\mu\text{g}$  of BC261/ $2\times 10^7$  T cell) were administered in mice bearing EFT PDX (ES3a), and serum cytokine levels were measured at different time points post treatment.

(B) *In vivo* cytokine release was compared among groups by analyzing each AUC.

Supplementary Fig. S5. In vivo anti-tumor efficacy: dose titration of BC261

(A) Decreasing doses of BC261 were administered with  $2 \times 10^6$  T cells twice per week for 2-3 weeks. Subcutaneous IL-2 (1000 IU) was supplemented with each T cell injection. (B) *In vivo* anti-tumor effect of decreasing doses of STEAP1 BsAb BC261 against TC-32 cell line xenografts. (C) Monitoring of relative body weight after treatment. (D) Survival curves for the mice treated with decreasing doses of BC261.

Supplementary Fig. S6. *In vivo* anti-tumor effect of BC261 against STEAP1(+) EFT.

(A) 10 $\mu$ g of BC261 was administered with  $2 \times 10^7$  of T cells twice per week for 2-3 weeks to treat EFT PDXs. Subcutaneous IL-2 (1000 IU) was supplemented with each T cell injection. (B) *In vivo* anti-tumor effect of BC261 against EFT PDX ES03a. (C) *In vivo* anti-tumor effect of BC261 against EFT PDX ES15a. Tumor growth, relative body weight, and overall survival after treatment were plotted.



## Supplementary Fig. S1

(A)

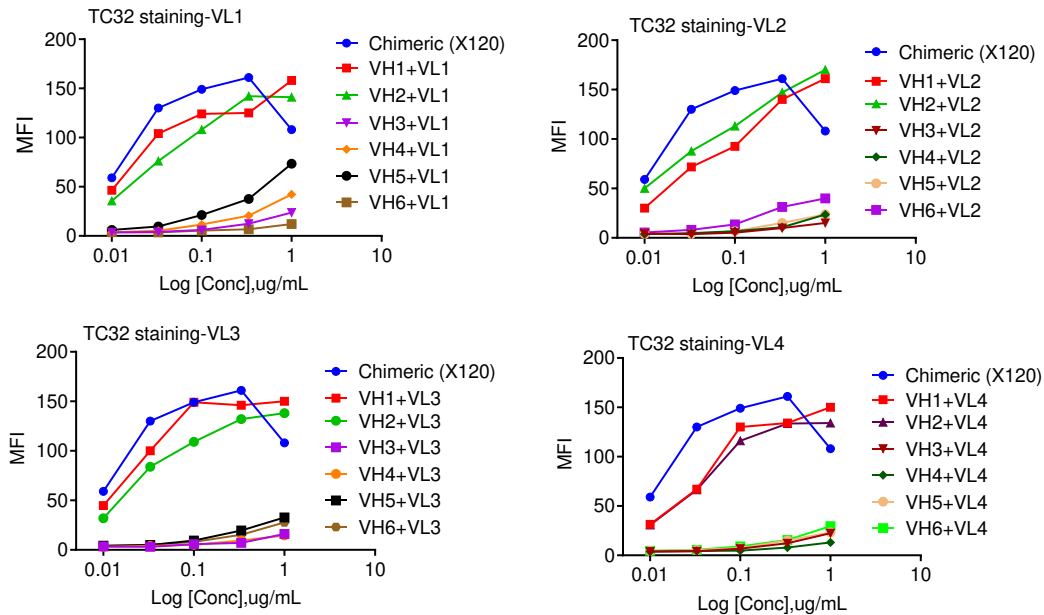

(B)

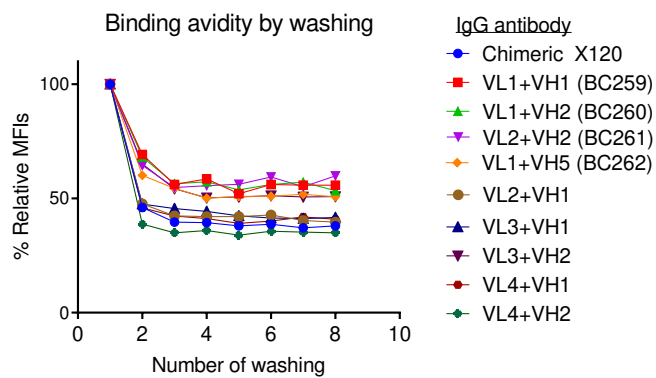

## Supplementary Fig. S2

(A)

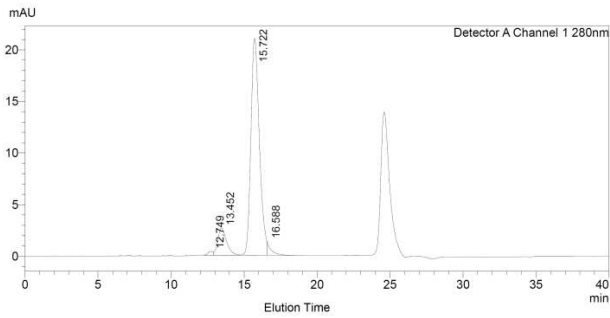

(B)

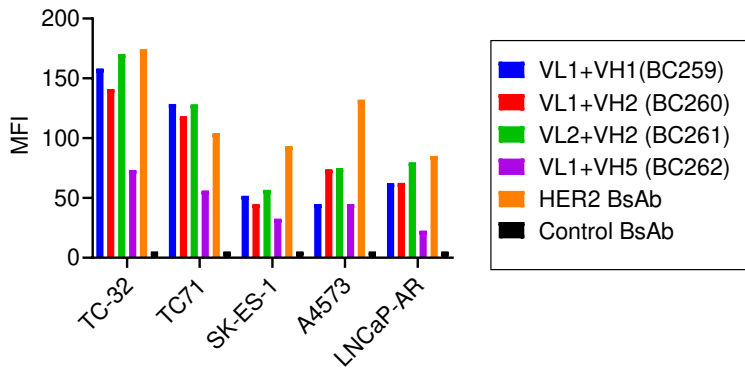

## Supplementary Fig. S3

(A)

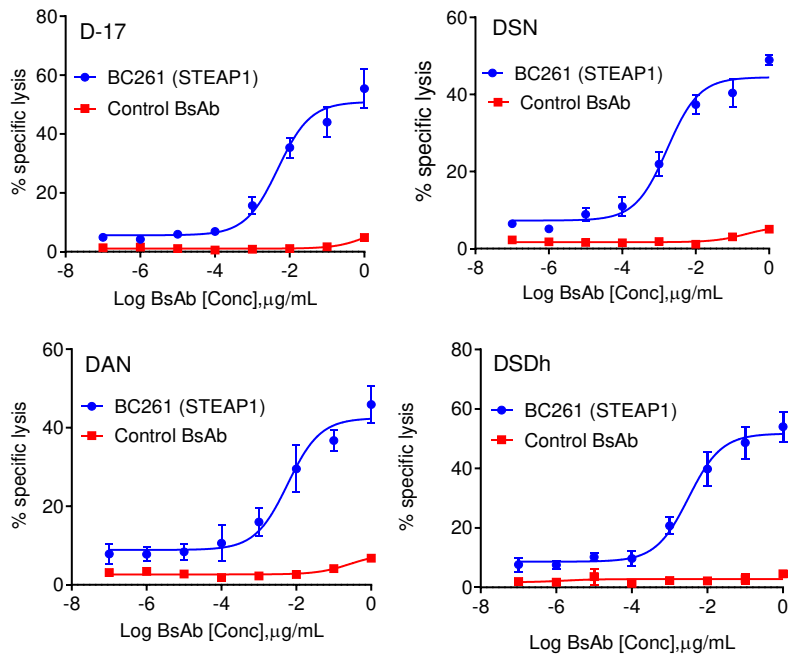

## Supplementary Fig. S4

(A)

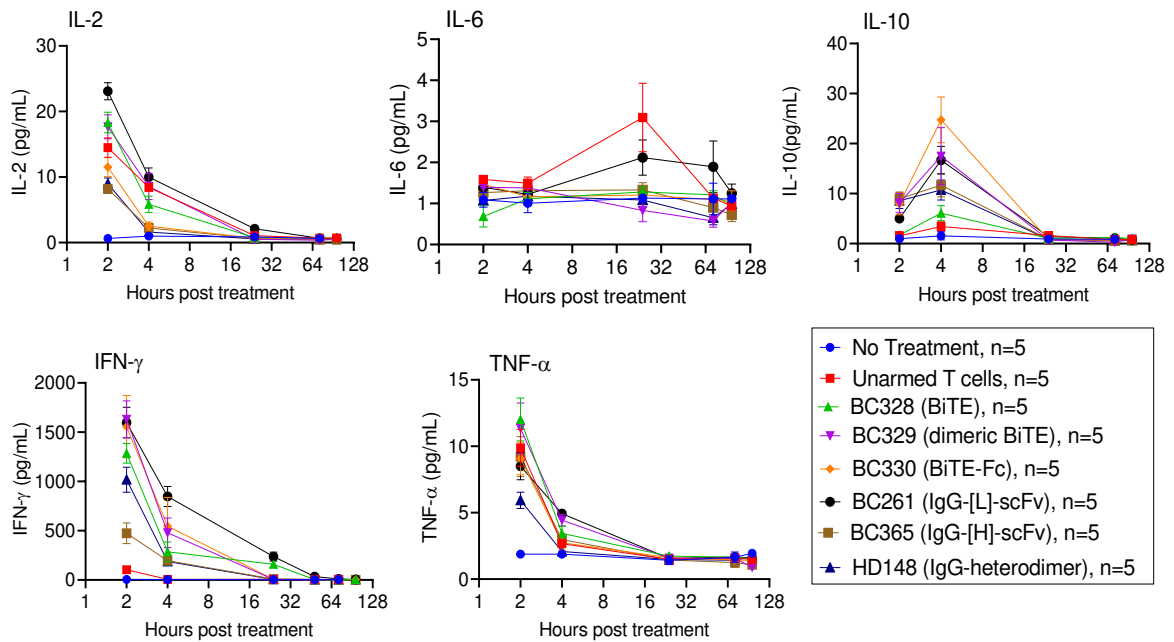

(B)

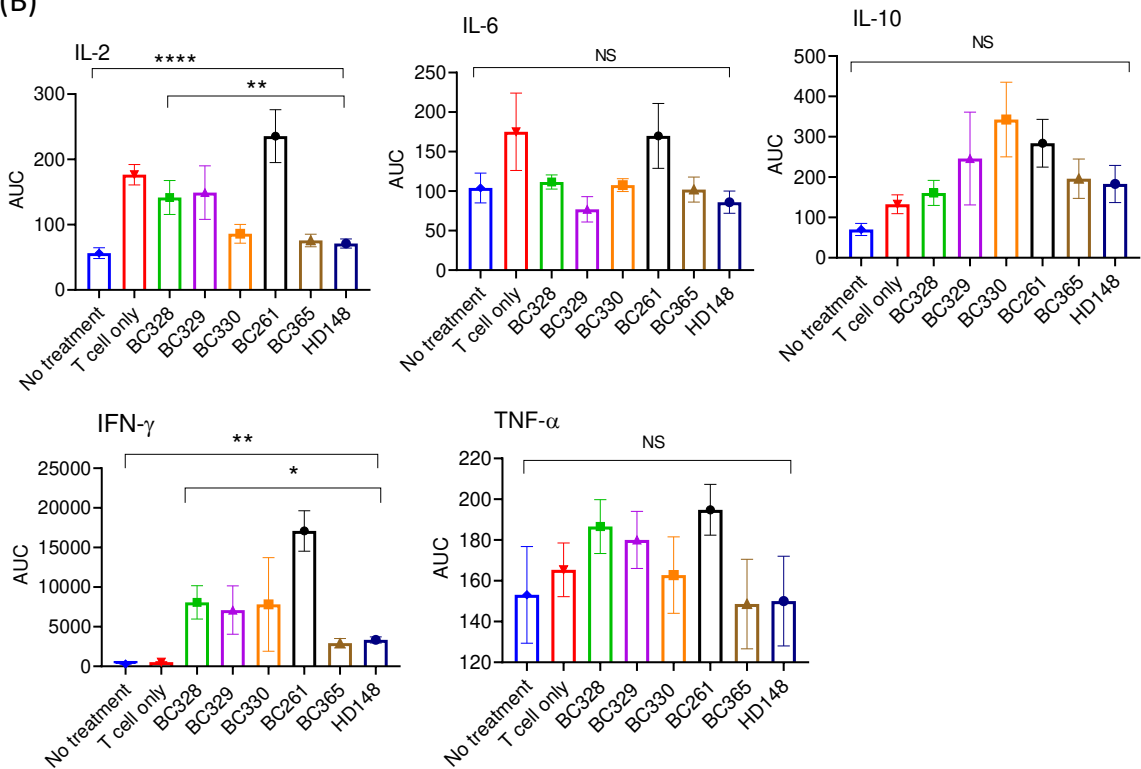

## Supplementary Fig. S5

(A)

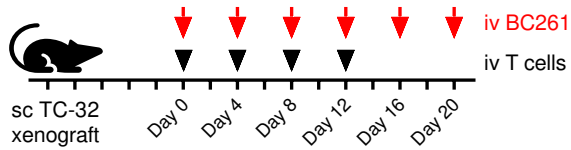

(B)

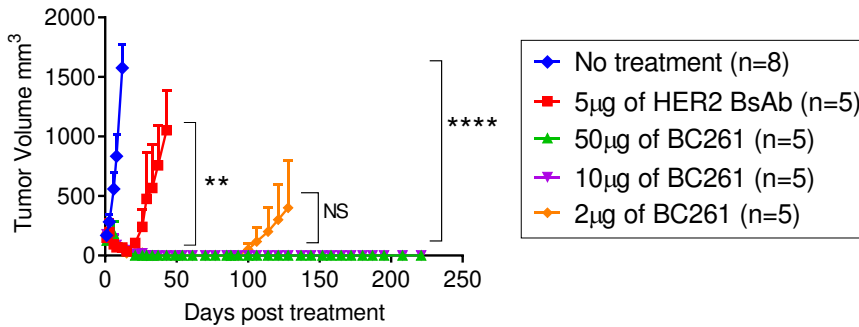

(C)

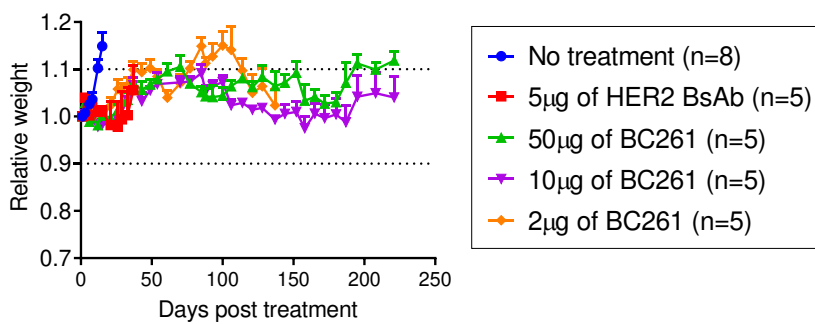

(D)

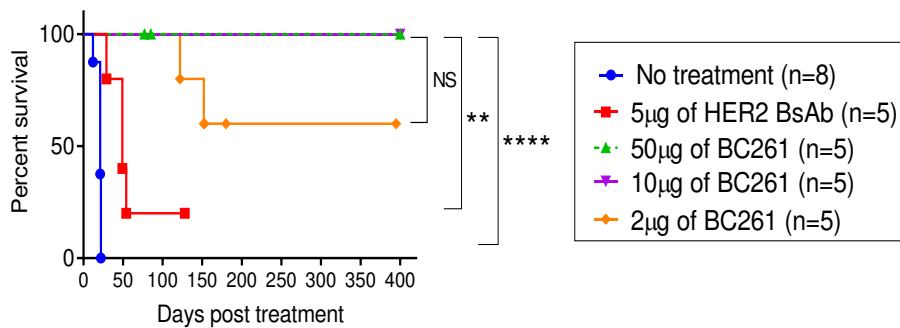

## Supplementary Fig. S6

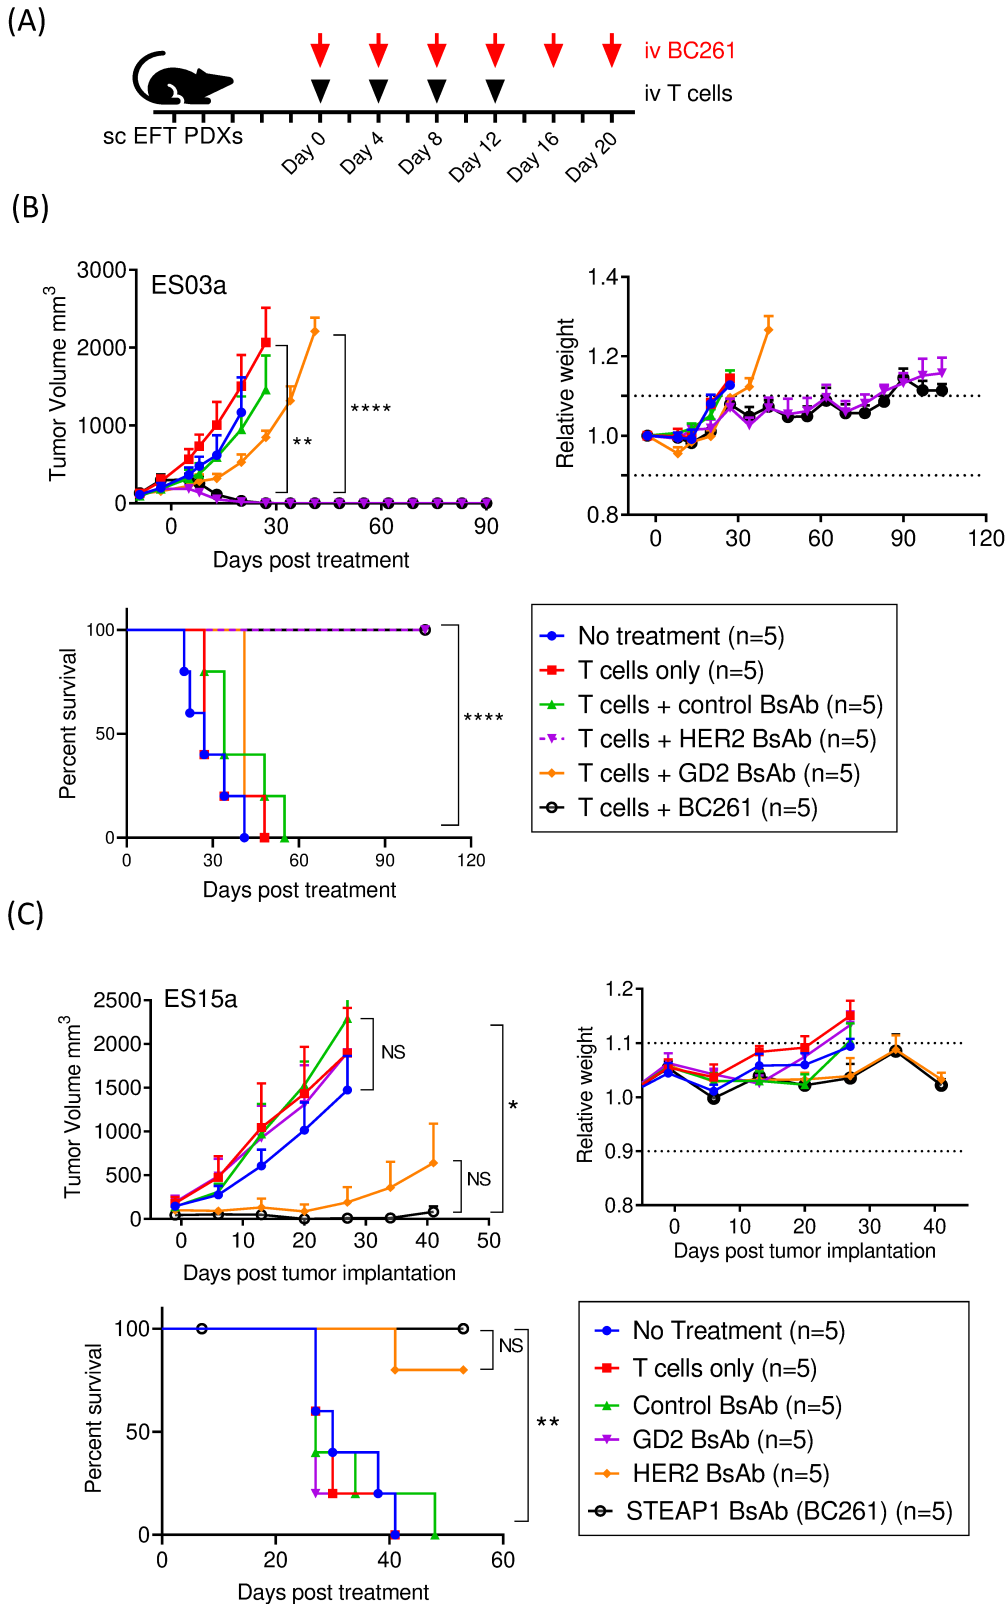

Supplement: jitc-2021-003114supp001.pdf [file jitc-2021-003114supp001.pdf]
